# Supplementary material for: IL7R Is Correlated With Immune Cell Infiltration in the Tumor Microenvironment of Lung Adenocarcinoma
Source: Front Pharmacol. 2022 Feb 21;13:857289. doi: 10.3389/fphar.2022.857289 (PMC8899515; doi:10.3389/fphar.2022.857289)
Supplement: Supplementary file 3 [file Table3.XLS]

## Sheet: IL7R_gsea_report_for_H_15979774
NAME	GS<br> follow link to MSigDB	GS DETAILS	SIZE	ES	NES	NOM p-val	FDR q-val	FWER p-val	RANK AT MAX	LEADING EDGE
KEGG_LEISHMANIA_INFECTION	KEGG_LEISHMANIA_INFECTION	Details ...	67	0.783869	2.3823	0	0	0	1736	tags=63%, list=13%, signal=72%
KEGG_B_CELL_RECEPTOR_SIGNALING_PATHWAY	KEGG_B_CELL_RECEPTOR_SIGNALING_PATHWAY	Details ...	70	0.683245	2.36793	0	0	0	1394	tags=44%, list=10%, signal=49%
KEGG_CHEMOKINE_SIGNALING_PATHWAY	KEGG_CHEMOKINE_SIGNALING_PATHWAY	Details ...	166	0.610223	2.35816	0	0	0	2247	tags=43%, list=17%, signal=51%
KEGG_CELL_ADHESION_MOLECULES_CAMS	KEGG_CELL_ADHESION_MOLECULES_CAMS	Details ...	118	0.678129	2.33752	0	0	0	906	tags=38%, list=7%, signal=41%
KEGG_T_CELL_RECEPTOR_SIGNALING_PATHWAY	KEGG_T_CELL_RECEPTOR_SIGNALING_PATHWAY	Details ...	103	0.631795	2.32552	0	0	0	1673	tags=38%, list=12%, signal=43%
KEGG_NATURAL_KILLER_CELL_MEDIATED_CYTOTOXICITY	KEGG_NATURAL_KILLER_CELL_MEDIATED_CYTOTOXICITY	Details ...	118	0.678209	2.32174	0	0	0	2262	tags=50%, list=17%, signal=60%
KEGG_CYTOKINE_CYTOKINE_RECEPTOR_INTERACTION	KEGG_CYTOKINE_CYTOKINE_RECEPTOR_INTERACTION	Details ...	229	0.650645	2.30521	0	0	0	2364	tags=49%, list=17%, signal=58%
KEGG_LEUKOCYTE_TRANSENDOTHELIAL_MIGRATION	KEGG_LEUKOCYTE_TRANSENDOTHELIAL_MIGRATION	Details ...	106	0.617221	2.30075	0	0	0	2302	tags=43%, list=17%, signal=52%
KEGG_HEMATOPOIETIC_CELL_LINEAGE	KEGG_HEMATOPOIETIC_CELL_LINEAGE	Details ...	82	0.701552	2.23256	0	0.000286955	0.002	2437	tags=63%, list=18%, signal=77%
KEGG_FC_EPSILON_RI_SIGNALING_PATHWAY	KEGG_FC_EPSILON_RI_SIGNALING_PATHWAY	Details ...	72	0.583894	2.22058	0	0.000258259	0.002	1506	tags=33%, list=11%, signal=37%
KEGG_TOLL_LIKE_RECEPTOR_SIGNALING_PATHWAY	KEGG_TOLL_LIKE_RECEPTOR_SIGNALING_PATHWAY	Details ...	94	0.633939	2.20796	0	0.000345453	0.003	1790	tags=44%, list=13%, signal=50%
KEGG_VIRAL_MYOCARDITIS	KEGG_VIRAL_MYOCARDITIS	Details ...	65	0.6751	2.1693	0	0.000316665	0.003	1561	tags=48%, list=12%, signal=54%
KEGG_NOD_LIKE_RECEPTOR_SIGNALING_PATHWAY	KEGG_NOD_LIKE_RECEPTOR_SIGNALING_PATHWAY	Details ...	54	0.621507	2.14795	0	0.000377608	0.003	2353	tags=52%, list=17%, signal=63%
KEGG_INTESTINAL_IMMUNE_NETWORK_FOR_IGA_PRODUCTION	KEGG_INTESTINAL_IMMUNE_NETWORK_FOR_IGA_PRODUCTION	Details ...	41	0.764646	2.14303	0	0.000455899	0.004	1511	tags=66%, list=11%, signal=74%
KEGG_JAK_STAT_SIGNALING_PATHWAY	KEGG_JAK_STAT_SIGNALING_PATHWAY	Details ...	138	0.58438	2.11962	0	0.000651182	0.007	3535	tags=57%, list=26%, signal=76%
KEGG_PRIMARY_IMMUNODEFICIENCY	KEGG_PRIMARY_IMMUNODEFICIENCY	Details ...	33	0.747941	2.07927	0	0.00088256	0.011	1467	tags=64%, list=11%, signal=71%
KEGG_AUTOIMMUNE_THYROID_DISEASE	KEGG_AUTOIMMUNE_THYROID_DISEASE	Details ...	46	0.767154	2.07531	0	0.000895875	0.011	1583	tags=65%, list=12%, signal=74%
KEGG_TYPE_I_DIABETES_MELLITUS	KEGG_TYPE_I_DIABETES_MELLITUS	Details ...	39	0.763456	2.072	0	0.000910251	0.012	1511	tags=69%, list=11%, signal=78%
KEGG_ALLOGRAFT_REJECTION	KEGG_ALLOGRAFT_REJECTION	Details ...	33	0.835831	2.0562	0	0.00133601	0.017	1511	tags=82%, list=11%, signal=92%
KEGG_GRAFT_VERSUS_HOST_DISEASE	KEGG_GRAFT_VERSUS_HOST_DISEASE	Details ...	35	0.845872	2.05269	0	0.0013581	0.018	1511	tags=80%, list=11%, signal=90%
KEGG_FC_GAMMA_R_MEDIATED_PHAGOCYTOSIS	KEGG_FC_GAMMA_R_MEDIATED_PHAGOCYTOSIS	Details ...	90	0.526725	2.04237	0	0.00134422	0.019	2291	tags=36%, list=17%, signal=43%
KEGG_ANTIGEN_PROCESSING_AND_PRESENTATION	KEGG_ANTIGEN_PROCESSING_AND_PRESENTATION	Details ...	72	0.638979	1.95792	0.00406504	0.00457624	0.06	1649	tags=49%, list=12%, signal=55%
KEGG_ASTHMA	KEGG_ASTHMA	Details ...	26	0.776753	1.92492	0.00204918	0.00698212	0.093	2002	tags=77%, list=15%, signal=90%
KEGG_VASCULAR_SMOOTH_MUSCLE_CONTRACTION	KEGG_VASCULAR_SMOOTH_MUSCLE_CONTRACTION	Details ...	97	0.520612	1.92235	0	0.00688468	0.094	2677	tags=40%, list=20%, signal=50%
KEGG_APOPTOSIS	KEGG_APOPTOSIS	Details ...	83	0.476783	1.87236	0.002079	0.0117724	0.145	2465	tags=36%, list=18%, signal=44%
KEGG_MAPK_SIGNALING_PATHWAY	KEGG_MAPK_SIGNALING_PATHWAY	Details ...	239	0.41661	1.84301	0	0.0152707	0.187	2705	tags=31%, list=20%, signal=38%
KEGG_ALDOSTERONE_REGULATED_SODIUM_REABSORPTION	KEGG_ALDOSTERONE_REGULATED_SODIUM_REABSORPTION	Details ...	39	0.511876	1.81528	0	0.019231	0.237	2262	tags=31%, list=17%, signal=37%
KEGG_PANCREATIC_CANCER	KEGG_PANCREATIC_CANCER	Details ...	68	0.448606	1.81379	0	0.0189308	0.241	1309	tags=24%, list=10%, signal=26%
KEGG_CYTOSOLIC_DNA_SENSING_PATHWAY	KEGG_CYTOSOLIC_DNA_SENSING_PATHWAY	Details ...	46	0.5208	1.79565	0.00423729	0.0228168	0.288	2118	tags=50%, list=16%, signal=59%
KEGG_FOCAL_ADHESION	KEGG_FOCAL_ADHESION	Details ...	188	0.460103	1.78973	0.00609756	0.0231202	0.303	3541	tags=46%, list=26%, signal=61%
KEGG_REGULATION_OF_ACTIN_CYTOSKELETON	KEGG_REGULATION_OF_ACTIN_CYTOSKELETON	Details ...	193	0.40993	1.78083	0	0.024817	0.324	2537	tags=28%, list=19%, signal=34%
KEGG_SYSTEMIC_LUPUS_ERYTHEMATOSUS	KEGG_SYSTEMIC_LUPUS_ERYTHEMATOSUS	Details ...	92	0.495988	1.77265	0.0139721	0.0257264	0.342	1511	tags=29%, list=11%, signal=33%
KEGG_NEUROACTIVE_LIGAND_RECEPTOR_INTERACTION	KEGG_NEUROACTIVE_LIGAND_RECEPTOR_INTERACTION	Details ...	240	0.513961	1.77094	0.00813008	0.0254264	0.349	4215	tags=58%, list=31%, signal=82%
KEGG_LYSOSOME	KEGG_LYSOSOME	Details ...	103	0.511248	1.7563	0.0163934	0.028065	0.38	2009	tags=35%, list=15%, signal=41%
KEGG_DILATED_CARDIOMYOPATHY	KEGG_DILATED_CARDIOMYOPATHY	Details ...	81	0.494507	1.73889	0.00201207	0.03194	0.423	4648	tags=64%, list=34%, signal=97%
KEGG_RIG_I_LIKE_RECEPTOR_SIGNALING_PATHWAY	KEGG_RIG_I_LIKE_RECEPTOR_SIGNALING_PATHWAY	Details ...	64	0.45561	1.67295	0.00612245	0.0558406	0.61	2931	tags=44%, list=22%, signal=56%
KEGG_ECM_RECEPTOR_INTERACTION	KEGG_ECM_RECEPTOR_INTERACTION	Details ...	79	0.50989	1.65967	0.0205339	0.0599529	0.635	4519	tags=70%, list=33%, signal=104%
KEGG_ARACHIDONIC_ACID_METABOLISM	KEGG_ARACHIDONIC_ACID_METABOLISM	Details ...	46	0.486364	1.65787	0.0101215	0.059175	0.638	2172	tags=33%, list=16%, signal=39%
KEGG_AXON_GUIDANCE	KEGG_AXON_GUIDANCE	Details ...	111	0.397513	1.63997	0.00798403	0.066982	0.696	3155	tags=33%, list=23%, signal=43%
KEGG_VEGF_SIGNALING_PATHWAY	KEGG_VEGF_SIGNALING_PATHWAY	Details ...	67	0.418616	1.63334	0.0221328	0.0684423	0.71	1506	tags=19%, list=11%, signal=22%
KEGG_DORSO_VENTRAL_AXIS_FORMATION	KEGG_DORSO_VENTRAL_AXIS_FORMATION	Details ...	19	0.54111	1.63013	0.0162933	0.068298	0.718	1291	tags=26%, list=10%, signal=29%
KEGG_HYPERTROPHIC_CARDIOMYOPATHY_HCM	KEGG_HYPERTROPHIC_CARDIOMYOPATHY_HCM	Details ...	75	0.457503	1.62485	0.0239521	0.0690475	0.723	4648	tags=63%, list=34%, signal=95%
KEGG_OLFACTORY_TRANSDUCTION	KEGG_OLFACTORY_TRANSDUCTION	Details ...	65	0.531298	1.59122	0.0403226	0.0839402	0.776	4865	tags=66%, list=36%, signal=103%
KEGG_PHOSPHATIDYLINOSITOL_SIGNALING_SYSTEM	KEGG_PHOSPHATIDYLINOSITOL_SIGNALING_SYSTEM	Details ...	70	0.422472	1.58724	0.0136187	0.0843176	0.782	3142	tags=29%, list=23%, signal=37%
KEGG_TASTE_TRANSDUCTION	KEGG_TASTE_TRANSDUCTION	Details ...	31	0.576286	1.58695	0.0380762	0.0826407	0.782	4581	tags=65%, list=34%, signal=97%
KEGG_PRION_DISEASES	KEGG_PRION_DISEASES	Details ...	33	0.472321	1.57452	0.031185	0.0874329	0.806	1427	tags=30%, list=11%, signal=34%
KEGG_EPITHELIAL_CELL_SIGNALING_IN_HELICOBACTER_PYLORI_INFECTION	KEGG_EPITHELIAL_CELL_SIGNALING_IN_HELICOBACTER_PYLORI_INFECTION	Details ...	61	0.409719	1.57365	0.0121704	0.0861544	0.807	2076	tags=28%, list=15%, signal=33%
KEGG_GLYCOSPHINGOLIPID_BIOSYNTHESIS_GLOBO_SERIES	KEGG_GLYCOSPHINGOLIPID_BIOSYNTHESIS_GLOBO_SERIES	Details ...	13	0.556067	1.55691	0.027833	0.0951387	0.831	3946	tags=54%, list=29%, signal=76%
KEGG_ACUTE_MYELOID_LEUKEMIA	KEGG_ACUTE_MYELOID_LEUKEMIA	Details ...	55	0.403407	1.55217	0.0162272	0.0960353	0.841	3199	tags=38%, list=24%, signal=50%
KEGG_CALCIUM_SIGNALING_PATHWAY	KEGG_CALCIUM_SIGNALING_PATHWAY	Details ...	161	0.401662	1.55188	0.0162602	0.0942232	0.841	4088	tags=43%, list=30%, signal=62%
KEGG_TYPE_II_DIABETES_MELLITUS	KEGG_TYPE_II_DIABETES_MELLITUS	Details ...	42	0.437314	1.54879	0.0223577	0.0940689	0.843	2732	tags=33%, list=20%, signal=42%
KEGG_GLIOMA	KEGG_GLIOMA	Details ...	59	0.37961	1.49327	0.0352251	0.131419	0.92	1389	tags=19%, list=10%, signal=21%
KEGG_REGULATION_OF_AUTOPHAGY	KEGG_REGULATION_OF_AUTOPHAGY	Details ...	29	0.439602	1.48248	0.0551331	0.137682	0.928	3765	tags=55%, list=28%, signal=76%
KEGG_ENDOCYTOSIS	KEGG_ENDOCYTOSIS	Details ...	154	0.332398	1.47586	0.0190678	0.140281	0.935	2225	tags=23%, list=16%, signal=27%
KEGG_NEUROTROPHIN_SIGNALING_PATHWAY	KEGG_NEUROTROPHIN_SIGNALING_PATHWAY	Details ...	117	0.343237	1.45319	0.0389344	0.155131	0.954	2612	tags=26%, list=19%, signal=33%
KEGG_COMPLEMENT_AND_COAGULATION_CASCADES	KEGG_COMPLEMENT_AND_COAGULATION_CASCADES	Details ...	66	0.487126	1.44504	0.10124	0.158738	0.96	2103	tags=29%, list=16%, signal=34%
KEGG_PATHWAYS_IN_CANCER	KEGG_PATHWAYS_IN_CANCER	Details ...	304	0.2948	1.41707	0.0104822	0.180039	0.975	2961	tags=28%, list=22%, signal=35%
KEGG_LONG_TERM_DEPRESSION	KEGG_LONG_TERM_DEPRESSION	Details ...	62	0.351896	1.36702	0.0748441	0.225399	0.985	3492	tags=37%, list=26%, signal=50%
KEGG_NON_SMALL_CELL_LUNG_CANCER	KEGG_NON_SMALL_CELL_LUNG_CANCER	Details ...	52	0.357289	1.35138	0.0938776	0.238318	0.989	956	tags=15%, list=7%, signal=16%
KEGG_OTHER_GLYCAN_DEGRADATION	KEGG_OTHER_GLYCAN_DEGRADATION	Details ...	12	0.54627	1.32542	0.173116	0.263152	0.993	4966	tags=83%, list=37%, signal=132%
KEGG_SMALL_CELL_LUNG_CANCER	KEGG_SMALL_CELL_LUNG_CANCER	Details ...	84	0.322711	1.31531	0.112016	0.270312	0.993	3185	tags=35%, list=24%, signal=45%
KEGG_COLORECTAL_CANCER	KEGG_COLORECTAL_CANCER	Details ...	60	0.330973	1.31398	0.11039	0.267351	0.993	1152	tags=17%, list=9%, signal=18%
KEGG_GNRH_SIGNALING_PATHWAY	KEGG_GNRH_SIGNALING_PATHWAY	Details ...	87	0.326267	1.30196	0.105788	0.276519	0.995	4497	tags=40%, list=33%, signal=60%
KEGG_CHRONIC_MYELOID_LEUKEMIA	KEGG_CHRONIC_MYELOID_LEUKEMIA	Details ...	70	0.315753	1.29839	0.10124	0.276317	0.995	1389	tags=20%, list=10%, signal=22%
KEGG_LONG_TERM_POTENTIATION	KEGG_LONG_TERM_POTENTIATION	Details ...	63	0.327001	1.26254	0.136929	0.313525	0.997	2704	tags=29%, list=20%, signal=36%
KEGG_ARRHYTHMOGENIC_RIGHT_VENTRICULAR_CARDIOMYOPATHY_ARVC	KEGG_ARRHYTHMOGENIC_RIGHT_VENTRICULAR_CARDIOMYOPATHY_ARVC	Details ...	67	0.341237	1.24763	0.175869	0.328395	0.998	4564	tags=49%, list=34%, signal=74%
KEGG_PATHOGENIC_ESCHERICHIA_COLI_INFECTION	KEGG_PATHOGENIC_ESCHERICHIA_COLI_INFECTION	Details ...	51	0.340063	1.23373	0.201207	0.341222	0.998	1463	tags=20%, list=11%, signal=22%
KEGG_RENIN_ANGIOTENSIN_SYSTEM	KEGG_RENIN_ANGIOTENSIN_SYSTEM	Details ...	16	0.437031	1.21756	0.221996	0.357703	0.999	2414	tags=38%, list=18%, signal=46%
KEGG_AMYOTROPHIC_LATERAL_SCLEROSIS_ALS	KEGG_AMYOTROPHIC_LATERAL_SCLEROSIS_ALS	Details ...	48	0.330278	1.19941	0.200413	0.376542	0.999	2473	tags=27%, list=18%, signal=33%
KEGG_GAP_JUNCTION	KEGG_GAP_JUNCTION	Details ...	84	0.294688	1.19101	0.208925	0.382739	0.999	2262	tags=20%, list=17%, signal=24%
KEGG_ADHERENS_JUNCTION	KEGG_ADHERENS_JUNCTION	Details ...	70	0.297246	1.17958	0.221996	0.394116	0.999	2418	tags=21%, list=18%, signal=26%
KEGG_SNARE_INTERACTIONS_IN_VESICULAR_TRANSPORT	KEGG_SNARE_INTERACTIONS_IN_VESICULAR_TRANSPORT	Details ...	33	0.334362	1.17779	0.223124	0.391045	0.999	2426	tags=27%, list=18%, signal=33%
KEGG_ADIPOCYTOKINE_SIGNALING_PATHWAY	KEGG_ADIPOCYTOKINE_SIGNALING_PATHWAY	Details ...	62	0.305018	1.17435	0.243902	0.390789	0.999	3380	tags=37%, list=25%, signal=49%
KEGG_ERBB_SIGNALING_PATHWAY	KEGG_ERBB_SIGNALING_PATHWAY	Details ...	82	0.282398	1.17175	0.207039	0.389021	0.999	3921	tags=35%, list=29%, signal=50%
KEGG_PROSTATE_CANCER	KEGG_PROSTATE_CANCER	Details ...	85	0.276907	1.17144	0.194726	0.384259	0.999	1482	tags=16%, list=11%, signal=18%
KEGG_MELANOMA	KEGG_MELANOMA	Details ...	67	0.282726	1.14724	0.224449	0.413128	0.999	1389	tags=13%, list=10%, signal=15%
KEGG_TIGHT_JUNCTION	KEGG_TIGHT_JUNCTION	Details ...	117	0.258866	1.12527	0.257669	0.440693	0.999	2439	tags=21%, list=18%, signal=26%
KEGG_HEDGEHOG_SIGNALING_PATHWAY	KEGG_HEDGEHOG_SIGNALING_PATHWAY	Details ...	44	0.307525	1.06413	0.370656	0.529575	1	3708	tags=34%, list=27%, signal=47%
KEGG_VIBRIO_CHOLERAE_INFECTION	KEGG_VIBRIO_CHOLERAE_INFECTION	Details ...	47	0.272734	1.06136	0.357143	0.527111	1	2325	tags=23%, list=17%, signal=28%
KEGG_INOSITOL_PHOSPHATE_METABOLISM	KEGG_INOSITOL_PHOSPHATE_METABOLISM	Details ...	49	0.283142	1.05503	0.382178	0.530846	1	706	tags=10%, list=5%, signal=11%
KEGG_GLYCOSPHINGOLIPID_BIOSYNTHESIS_GANGLIO_SERIES	KEGG_GLYCOSPHINGOLIPID_BIOSYNTHESIS_GANGLIO_SERIES	Details ...	12	0.365635	1.02135	0.444444	0.57981	1	4773	tags=67%, list=35%, signal=103%
KEGG_ABC_TRANSPORTERS	KEGG_ABC_TRANSPORTERS	Details ...	35	0.293502	1.01972	0.440882	0.574858	1	2325	tags=26%, list=17%, signal=31%
KEGG_GLYCOSPHINGOLIPID_BIOSYNTHESIS_LACTO_AND_NEOLACTO_SERIES	KEGG_GLYCOSPHINGOLIPID_BIOSYNTHESIS_LACTO_AND_NEOLACTO_SERIES	Details ...	24	0.329531	1.00978	0.459794	0.585372	1	4771	tags=38%, list=35%, signal=58%
KEGG_MTOR_SIGNALING_PATHWAY	KEGG_MTOR_SIGNALING_PATHWAY	Details ...	46	0.257649	1.00906	0.446602	0.579511	1	1310	tags=15%, list=10%, signal=17%
KEGG_SULFUR_METABOLISM	KEGG_SULFUR_METABOLISM	Details ...	10	0.410031	1.00361	0.458586	0.581855	1	2624	tags=30%, list=19%, signal=37%
KEGG_INSULIN_SIGNALING_PATHWAY	KEGG_INSULIN_SIGNALING_PATHWAY	Details ...	127	0.22595	0.998402	0.443089	0.583157	1	2860	tags=24%, list=21%, signal=31%
KEGG_RENAL_CELL_CARCINOMA	KEGG_RENAL_CELL_CARCINOMA	Details ...	67	0.23994	0.995077	0.442424	0.581831	1	2102	tags=19%, list=16%, signal=23%
KEGG_ENDOMETRIAL_CANCER	KEGG_ENDOMETRIAL_CANCER	Details ...	50	0.2581	0.991188	0.467775	0.581376	1	956	tags=10%, list=7%, signal=11%
KEGG_GLYCOSAMINOGLYCAN_DEGRADATION	KEGG_GLYCOSAMINOGLYCAN_DEGRADATION	Details ...	20	0.328967	0.984764	0.454545	0.584033	1	5620	tags=60%, list=42%, signal=103%
KEGG_TGF_BETA_SIGNALING_PATHWAY	KEGG_TGF_BETA_SIGNALING_PATHWAY	Details ...	78	0.227875	0.926954	0.563674	0.673634	1	2549	tags=22%, list=19%, signal=27%
KEGG_DRUG_METABOLISM_CYTOCHROME_P450	KEGG_DRUG_METABOLISM_CYTOCHROME_P450	Details ...	53	0.263855	0.872778	0.605882	0.759429	1	3932	tags=32%, list=29%, signal=45%
KEGG_ETHER_LIPID_METABOLISM	KEGG_ETHER_LIPID_METABOLISM	Details ...	25	0.260048	0.865955	0.681818	0.762457	1	1506	tags=16%, list=11%, signal=18%
KEGG_VASOPRESSIN_REGULATED_WATER_REABSORPTION	KEGG_VASOPRESSIN_REGULATED_WATER_REABSORPTION	Details ...	39	0.231072	0.862744	0.667355	0.759905	1	3708	tags=31%, list=27%, signal=42%
KEGG_GLYCOSAMINOGLYCAN_BIOSYNTHESIS_CHONDROITIN_SULFATE	KEGG_GLYCOSAMINOGLYCAN_BIOSYNTHESIS_CHONDROITIN_SULFATE	Details ...	17	0.299197	0.848205	0.66	0.777154	1	5748	tags=59%, list=43%, signal=102%
KEGG_BLADDER_CANCER	KEGG_BLADDER_CANCER	Details ...	38	0.222114	0.846274	0.683673	0.772035	1	1389	tags=13%, list=10%, signal=15%
KEGG_PROGESTERONE_MEDIATED_OOCYTE_MATURATION	KEGG_PROGESTERONE_MEDIATED_OOCYTE_MATURATION	Details ...	73	0.205871	0.785953	0.749482	0.863012	1	2213	tags=21%, list=16%, signal=24%
KEGG_RETINOL_METABOLISM	KEGG_RETINOL_METABOLISM	Details ...	39	0.24408	0.767132	0.756	0.883513	1	4193	tags=36%, list=31%, signal=52%
KEGG_PRIMARY_BILE_ACID_BIOSYNTHESIS	KEGG_PRIMARY_BILE_ACID_BIOSYNTHESIS	Details ...	14	0.261636	0.730376	0.80943	0.929596	1	1311	tags=14%, list=10%, signal=16%
KEGG_CIRCADIAN_RHYTHM_MAMMAL	KEGG_CIRCADIAN_RHYTHM_MAMMAL	Details ...	11	0.282127	0.711874	0.787992	0.945896	1	3043	tags=27%, list=23%, signal=35%
KEGG_SPHINGOLIPID_METABOLISM	KEGG_SPHINGOLIPID_METABOLISM	Details ...	27	0.213292	0.704658	0.880165	0.945691	1	2634	tags=19%, list=19%, signal=23%
KEGG_ALPHA_LINOLENIC_ACID_METABOLISM	KEGG_ALPHA_LINOLENIC_ACID_METABOLISM		13	0.259083	0.702898	0.85102	0.938537	1	1506	tags=15%, list=11%, signal=17%
KEGG_PROXIMAL_TUBULE_BICARBONATE_RECLAMATION	KEGG_PROXIMAL_TUBULE_BICARBONATE_RECLAMATION		21	0.235446	0.701691	0.861272	0.931044	1	2108	tags=24%, list=16%, signal=28%
KEGG_GLYCEROLIPID_METABOLISM	KEGG_GLYCEROLIPID_METABOLISM		40	0.203623	0.699859	0.903661	0.924337	1	3406	tags=30%, list=25%, signal=40%
KEGG_MELANOGENESIS	KEGG_MELANOGENESIS		86	0.171328	0.685566	0.947262	0.932287	1	2651	tags=16%, list=20%, signal=20%
KEGG_STEROID_HORMONE_BIOSYNTHESIS	KEGG_STEROID_HORMONE_BIOSYNTHESIS		39	0.20167	0.675886	0.886905	0.934153	1	4419	tags=33%, list=33%, signal=49%
KEGG_GLYCOSAMINOGLYCAN_BIOSYNTHESIS_HEPARAN_SULFATE	KEGG_GLYCOSAMINOGLYCAN_BIOSYNTHESIS_HEPARAN_SULFATE		21	0.220845	0.67462	0.905433	0.926597	1	2354	tags=19%, list=17%, signal=23%
KEGG_LINOLEIC_ACID_METABOLISM	KEGG_LINOLEIC_ACID_METABOLISM		22	0.223666	0.65371	0.898167	0.938992	1	4869	tags=36%, list=36%, signal=57%
KEGG_DRUG_METABOLISM_OTHER_ENZYMES	KEGG_DRUG_METABOLISM_OTHER_ENZYMES		32	0.194406	0.642828	0.942346	0.94034	1	3109	tags=28%, list=23%, signal=36%
KEGG_GLYCOSAMINOGLYCAN_BIOSYNTHESIS_KERATAN_SULFATE	KEGG_GLYCOSAMINOGLYCAN_BIOSYNTHESIS_KERATAN_SULFATE		12	0.234763	0.605802	0.934783	0.96001	1	10344	tags=100%, list=77%, signal=426%
KEGG_TAURINE_AND_HYPOTAURINE_METABOLISM	KEGG_TAURINE_AND_HYPOTAURINE_METABOLISM		7	0.241741	0.552738	0.968442	0.981235	1	4353	tags=43%, list=32%, signal=63%
KEGG_METABOLISM_OF_XENOBIOTICS_BY_CYTOCHROME_P450	KEGG_METABOLISM_OF_XENOBIOTICS_BY_CYTOCHROME_P450		48	0.15441	0.490137	0.98768	0.992023	1	3932	tags=27%, list=29%, signal=38%
KEGG_MATURITY_ONSET_DIABETES_OF_THE_YOUNG	KEGG_MATURITY_ONSET_DIABETES_OF_THE_YOUNG		22	0.157637	0.475979	0.996124	0.986562	1	11387	tags=100%, list=84%, signal=634%
